# Supplementary material
Source: PubMed Central journal article supplement (PMC3104757)
Supplement: JCI45627sd.pdf [file JCI45627sd.pdf]

## Supplementary Figure 1

A

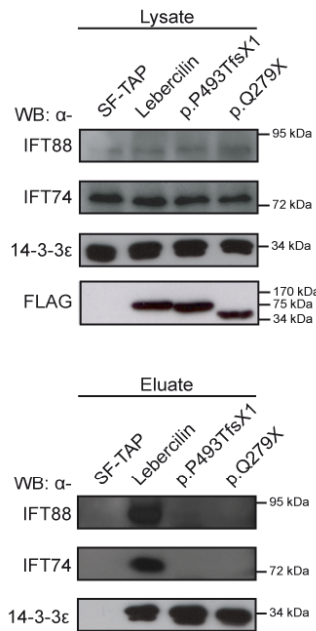

B

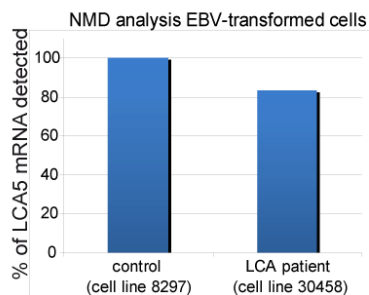

C

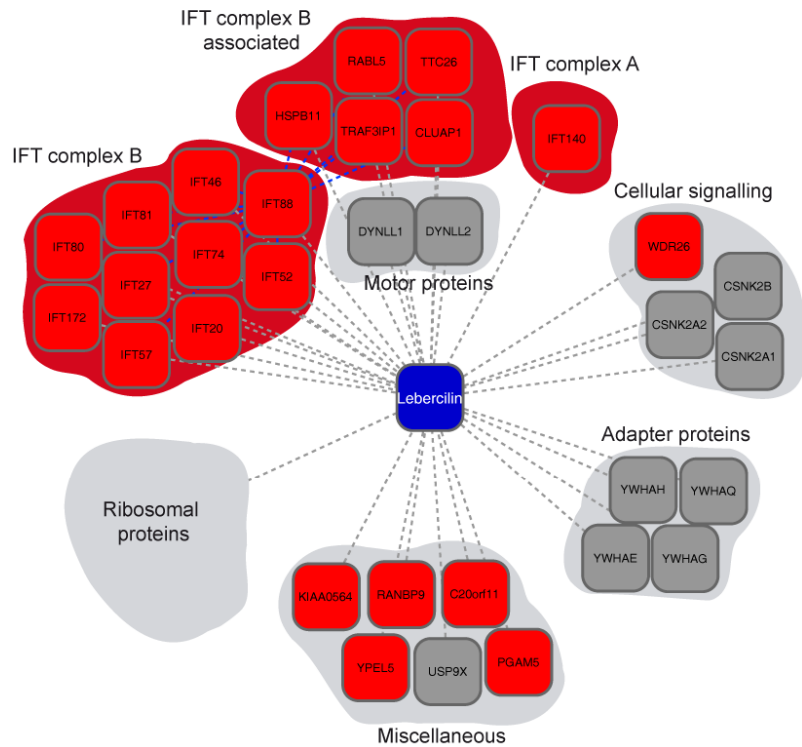

### Loss of IFT association to the Lebercilin protein complex.

(A) Loss of interaction of IFT proteins to both Lebercilin variants (p.P493TfsX1, p.Q279X) was confirmed by western blot. Both IFT74 and IFT88 could easily be detected in the Lebercilin Strep eluates but not in Strep eluates of p.P493TfsX1 and p.Q279X. The presence of the 14-3-3ε protein was not altered in these eluates, supporting mass spectrometric measurements (Supplementary Table 2). The expression levels of IFT88, IFT74 and 14-3-3ε were not altered due to the expression of Lebercilin and its mutants. Lebercilin and both mutant were expressed in HEK293T cells and migrate at the expected molecular weight. (B) *LCA5* mRNA expression is not significantly decreased in EBV-transformed lymphocytes derived from an LCA patient, harbouring a homozygous p.P493TfsX1 mutation in *LCA5* (cell line 30458; family 27240 (4)) compared to a control EBV-transformed lymphocytes (cell line 8297), as determined by qPCR. (C) Data obtained by quantitative protein complex analysis and comparison are represented. All proteins identified to be part of the Lebercilin protein complex are shown. Proteins, showing loss of binding to both Lebercilin-p.P493TfsX1 and p.Q279X are shown in red. Blue lines show the interconnectivity as determined by the IFT88-SF-TAP analysis (Supplementary Table 3).

Supplementary Figure 2

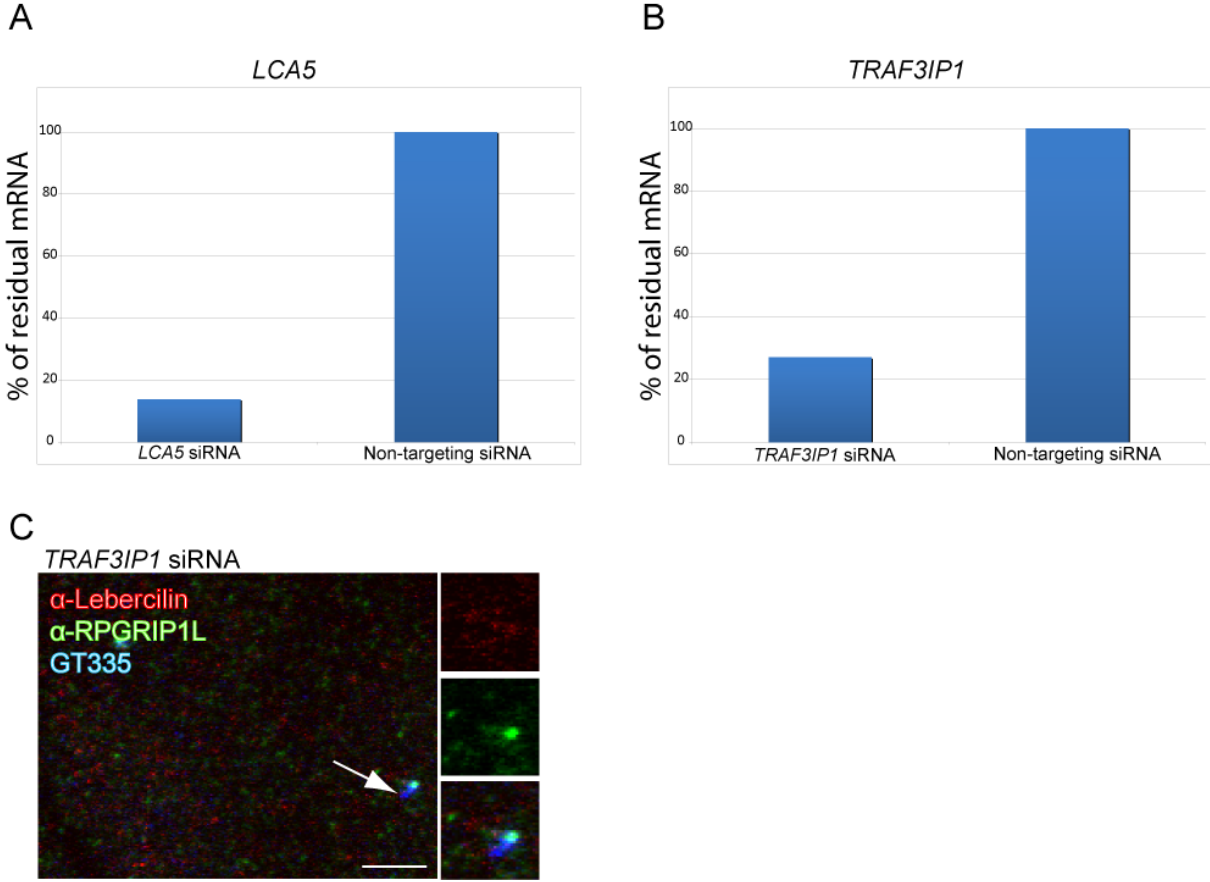

**Analysis of *LCA5* and *TRAF3IP1* knockdown.**  
 (A, B) Knockdown efficiency resulting from a 72 hours transfection of *LCA5* siRNA (15nM) (A) and *TRAF3IP1* siRNA (15nM) (B) respectively in hTERT-RPE1 cells, measured via qPCR. (C) siRNA-mediated knockdown of *TRAF3IP1* affects ciliogenesis and subsequent Lebercilin localization (white arrow). Anti-RPGRIP1L and GT335 stain basal body and primary cilium, respectively. Bar= 5  $\mu$ m.

**Supplementary Figure 3**

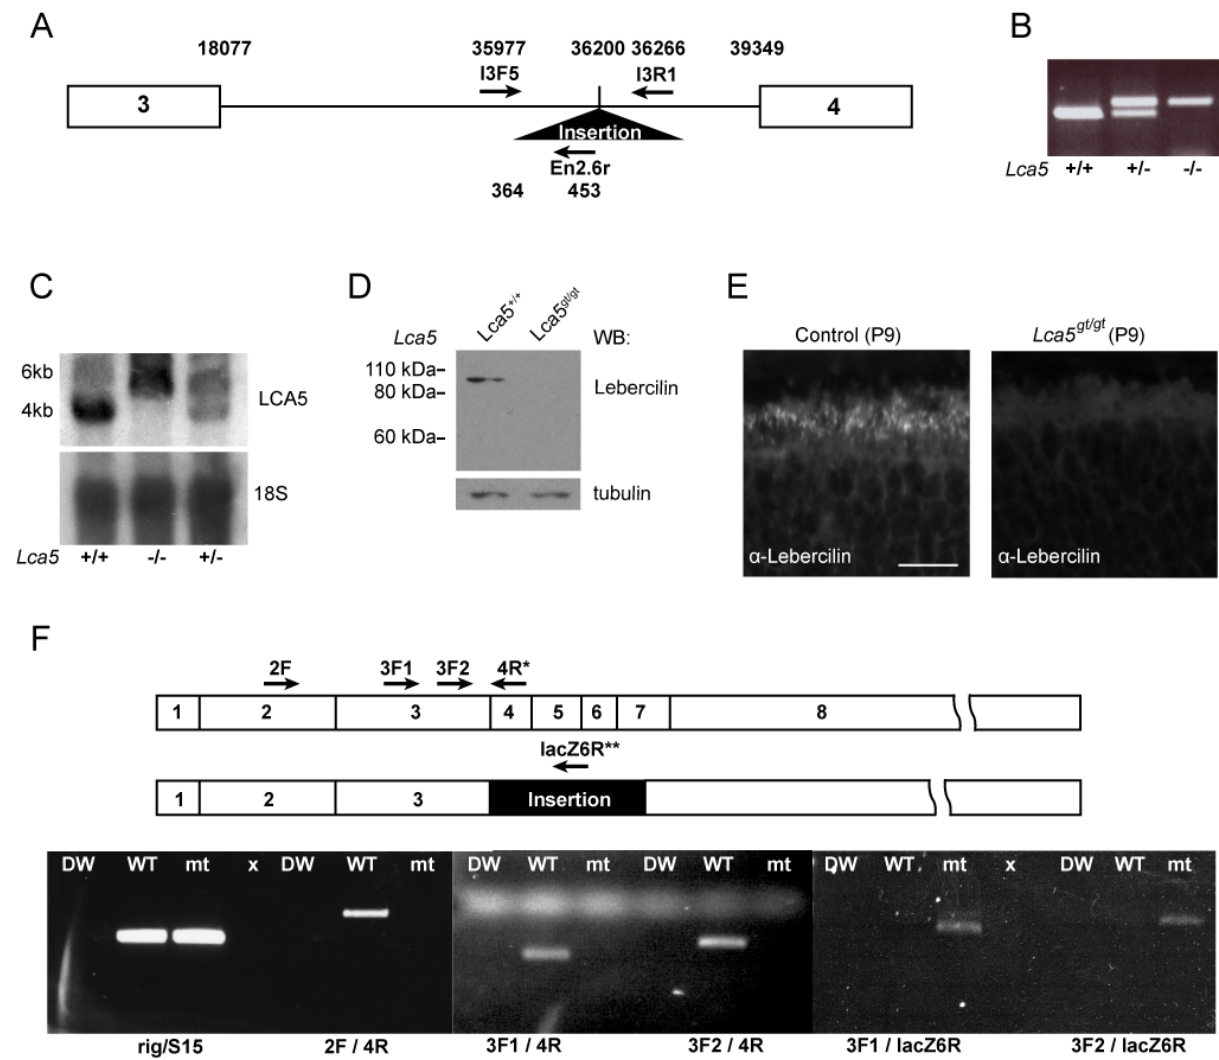

**Generating *Lca5* gene trap mice.**

(A) Genomic diagram of *Lca5* extending from exon 3 to 4. The gene trap is inserted into intron 3 (triangle) of *Lca5*. Numbers above the diagram indicate the genomic coordinates. Numbers below correspond to the gene trap backbone (pGT01Xr). Genotyping primers are indicated by arrows. (B) Genomic PCRs from tail DNA of *Lca5*<sup>+/+</sup>, *Lca5*<sup>+/-</sup> and *Lca5*<sup>gt/gt</sup> mice with indicated primer sets, generate a 290 bp or 402 bp PCR product for wildtype and gene trap alleles respectively. (C) Northern blot analysis of total RNA from *Lca5*<sup>+/+</sup>, *Lca5*<sup>gt/+</sup> and *Lca5*<sup>gt/gt</sup> retina, probed with a N-terminal 860 bp *Lca5* fragment. A transcript of ~4 kb was detected in wildtype mice, whereas a larger transcript was detected in *Lca5*<sup>gt/+</sup> mice. 18S RNA probe serves as loading control. (D) Western blot of retinal lysates of *Lca5*<sup>+/+</sup> and *Lca5*<sup>gt/gt</sup> mice (P12), stained with anti-Lebercilin 1702#2. Lebercilin is expressed in *Lca5*<sup>+/+</sup> retina, but absent in *Lca5*<sup>gt/gt</sup> retina.  $\gamma$ -tubulin serves as loading control. (E) Retina of *Lca5*<sup>gt/gt</sup> mice, stained with anti-Lebercilin (4), show loss of Lebercilin expression in photoreceptors. Bar= 20  $\mu$ m. (F) Top: Diagram of *Lca5* cDNA. The splice acceptor site in the gene trap (black box) induces missplicing of *Lca5*. RT-PCR primers are indicated with arrows and exons are numbered. Primers to detect either wildtype *Lca5* (4R) or *Lca5* gene trap (lacZ6R) are indicated with single and double asterisks respectively. Bottom: RT-PCR results of *Lca5*<sup>+/+</sup> and *Lca5*<sup>gt/gt</sup> mice. Primer set *rig/S15* serves as loading control. DW: distilled water. Mt: mutant.

### Supplementary Figure 4

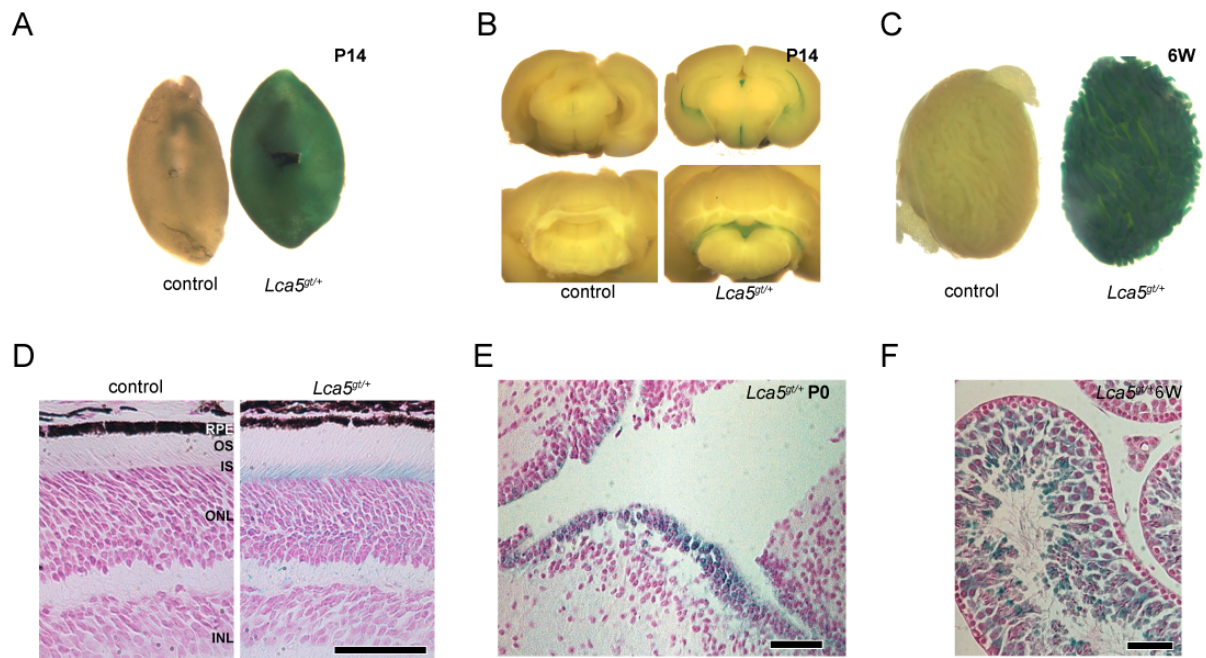

#### ***Lca5* expression analysis in tissues using the $\beta$ -galactosidase reporter in the gene trap.**

(A, D) In the retina, the entire photoreceptor layer and a subset of ganglion cells were *LacZ* positive at P14. (B, E) In the brain, reporter gene activity was observed in cells lining the third and the lateral ventricles at P0 and P14. (C, F) Strong reporter activity was detected in the testis as well at 6 weeks, with both Sertoli cells and spermatogonia stained positively for *LacZ* expression. RPE: retinal pigment epithelium, OS: outer segment, IS: inner segment, ONL: outer nuclear layer. OPL: outer plexiform layer, INL: inner nuclear layer, IPL: inner plexiform layer, GC: ganglion cell layer. Bar= 50  $\mu$ m.

## Supplementary Figure 5

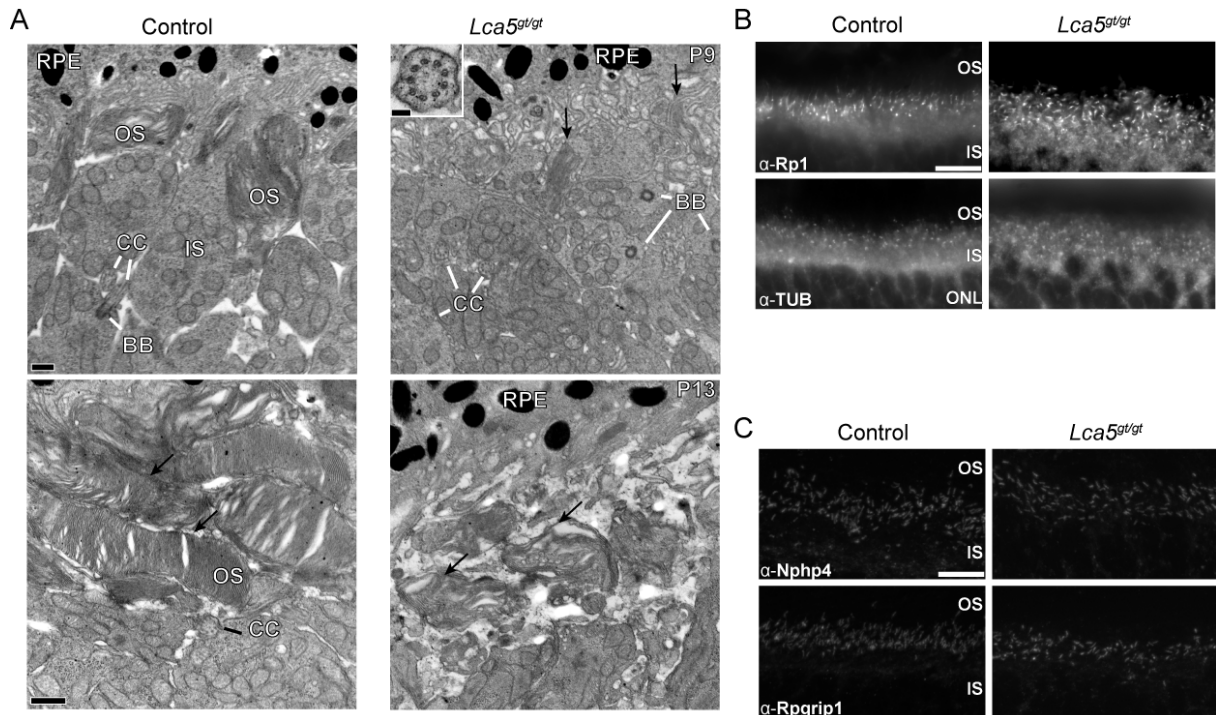

### Clinical and functional assessment of *Lca5<sup>gt/gt</sup>* mice.

(A) OS development is defective in *Lca5<sup>gt/gt</sup>* retinas. Transmission EM of control and *Lca5<sup>gt/gt</sup>* retina at P9 and P13. The initiation of OS in *Lca5<sup>gt/gt</sup>* mice is delayed and OS are shorter than in wildtype controls. OS of *Lca5<sup>gt/gt</sup>* mice are disorganized and discs appear to be oriented improperly (arrows) when compared to control OS. The structure of the CC in *Lca5<sup>gt/gt</sup>* mice appears to be normal. Bars= 500 nm, and 100 nm. (B) In *Lca5<sup>gt/gt</sup>* retina, the localization of Rp1, an axoneme marker, is comparable to controls. The number of stained basal bodies (anti- $\gamma$ -tubulin, TUB) in mutant *Lca5* retina is similar to controls but dispersed over the IS. Bar= 10  $\mu$ m. (C) The localization of ciliary disease gene products, Nphp4 and Rpgrip1 is not altered in *Lca5<sup>gt/gt</sup>* retina. Retinal sections were obtained at P14. OS: outer segment, IS: inner segment, ONL: outer nuclear layer, CC: connecting cilium, BB: basal body. Bar= 10  $\mu$ m.

## Supplementary Figure 6

A

### p.P493TfsX1

001 MGERAGSPGT DQERKAGKHH YSYLSDFETP QSSGRS**SLVS SSPASVRRKN**  
050 PK**RQTS**SDGQV **HHQAPR**KPSP KGLPNRKGVR VGFRSQSLNR EPLR**KD**TDLV  
100 **TKRIL**SARLL **KINELQNEVS ELQV**KLAELL **KENK**SLKRLQ YRQEK**ALN**KF  
150 **EDAENEIS**QL IFRHNNEITA **LKERLR**KSQE KERATEK**RVK D**TESEL**FRTK**  
200 FSLQ**KL**KEIS EARHLPERDD LAKKL**VSAEL K**LD**DTER**RIK ELSK**NLE**LST  
250 **NSFQ**RQLLAE **RKRAYE**AHDE **NKVLQ**R**EVQR** LYHKLKEKER ELDIKNIYSN  
300 RLPKSSPNKE KELAL**RKNA**A **CQSD**FADLCT **KG**VQ**TME**DFK **PEEY**PLTPET  
350 **IMCY**ENKWEE **PGHL**TLDLQS **QKQDR**HGEAG ILNPIMERE**E K**FVTDEELHV  
400 **VKQ**VEKLED EWEREELDKK **QKEK**ASLER **EKPE**WETGR **YQ**LGMYPIQN  
450 **MDK**LQGE**EEEE R**LKREMLLAK LNEIDRELQD SRNLKYPVLP LLT

**58.2% sequence coverage**

B

### p.Q279X

001 MGERAGSPGT DQERKAGKHH YSYLSDFETP QSSGR**SSLVS SSPASVRRKN**  
050 PK**RQTS**SDGQV **HHQAPR**KPSP KGLPNRKGVR VGFRSQSLNR EPLR**KD**TDLV  
100 **TKRIL**SARLL **KINELQNEVS ELQV**KLAELL **KENK**SLKRLQ YRQEK**ALN**KF  
150 **EDAENEIS**QL IFRHNNEITA **LKERLR**KSQE KERATEK**RVK D**TESEL**FRTK**  
200 FSLQ**KL**KEIS EARHLPERDD LAKKL**VSAEL K**LD**DTER**RIK ELSK**NLE**LST  
250 **NSFQ**RQLLAE **RKRAYE**AHDE **NKVLQ**KEVQ

**45.5% sequence coverage**

### Peptide identifications for Lebercilin mutants.

The peptides identified for the p.P493TfsX1 (A) and p.Q279X (B) Lebercilin mutants are highlighted in green. The peptides were identified from heavy labelled samples with more than 95% identification probability as determined by Mascot search against a human subset of the Swiss Prot database and Scaffold analysis. For the p.P493TfsX1 mutant 58.2% sequence coverage (A) and for the p.Q279X mutant 45.5% sequence coverage (B) could be observed over virtually the complete theoretical sequence.

**Supplementary table 1**

| Gene name                                            | Protein name                                         | Uniprot | WT/SF-TAP        |                  | p.P493TfsX1/WT |                  | p.Q279X/WT    |                  |
|------------------------------------------------------|------------------------------------------------------|---------|------------------|------------------|----------------|------------------|---------------|------------------|
|                                                      |                                                      |         | Enrichment ratio | Significance (A) | Binding ratio  | Significance (A) | Binding ratio | Significance (A) |
| <b>Lebercilin</b>                                    |                                                      |         |                  |                  |                |                  |               |                  |
| LCA5                                                 | Lebercilin                                           | Q86VQ0  | 11.92            | 8.947E-12        | NA             | NA               | NA            | NA               |
| <b>Motor proteins</b>                                |                                                      |         |                  |                  |                |                  |               |                  |
| DYNLL1                                               | Dynein light chain 1, cytoplasmic                    | P63167  | 12.87            | 1.938E-12        | 0.77           | 1.228E-01        | 0.04          | 1.279E-17        |
| DYNLL2                                               | Dynein light chain 2, cytoplasmic                    | Q96FJ2  | 9.64             | 4.646E-10        | 0.98           | 4.218E-01        | 0.03          | 1.986E-18        |
| <b>Intraflagellar transport complex B</b>            |                                                      |         |                  |                  |                |                  |               |                  |
| IFT20                                                | Intraflagellar transport protein 20 homolog          | Q8IY31  | 8.19             | 7.643E-09        | 0.09           | 2.463E-22        | 0.04          | 1.540E-17        |
| IFT27                                                | Intraflagellar transport protein 27 homolog          | Q9BW83  | 3.78             | 2.708E-04        | 0.09           | 6.077E-23        | 0.07          | 2.270E-12        |
| IFT46                                                | Intraflagellar transport protein 46 homolog          | A8K0F6  | 6.68             | 1.891E-07        | 0.05           | 7.290E-32        | 0.04          | 8.010E-17        |
| IFT52                                                | Intraflagellar transport protein 52 homolog          | Q9Y366  | 7.28             | 5.112E-08        | 0.11           | 1.415E-18        | 0.04          | 3.930E-17        |
| IFT57                                                | Intraflagellar transport protein 57 homolog          | Q9NWB7  | 6.56             | 2.521E-07        | 0.18           | 3.288E-12        | 0.06          | 5.160E-14        |
| IFT74                                                | Intraflagellar transport protein 74 homolog          | Q96LB3  | 6.38             | 3.740E-07        | 0.07           | 2.208E-25        | 0.06          | 6.580E-14        |
| IFT80                                                | Intraflagellar transport protein 80 homolog          | Q9P2H3  | 3.68             | 3.630E-04        | 0.09           | 3.283E-22        | 0.06          | 6.820E-13        |
| IFT81                                                | Intraflagellar transport protein 81 homolog          | Q8WYA0  | 5.39             | 3.924E-06        | 0.08           | 1.063E-24        | 0.05          | 1.300E-14        |
| IFT88                                                | Intraflagellar transport protein 88 homolog          | Q13099  | 5.10             | 8.070E-06        | 0.07           | 2.302E-26        | 0.03          | 3.020E-18        |
| IFT172                                               | Intraflagellar transport protein 172 homolog         | Q9UG01  | 8.64             | 3.153E-09        | 0.10           | 6.741E-21        | 0.06          | 3.720E-13        |
| <b>Intraflagellar transport complex B-associated</b> |                                                      |         |                  |                  |                |                  |               |                  |
| CLUAP1                                               | Clusterin-associated protein 1                       | Q96AJ1  | 8.38             | 5.298E-09        | 0.14           | 4.309E-15        | 0.05          | 1.200E-15        |
| HSPB11                                               | Heat shock protein beta-11                           | Q9Y547  | 3.57             | 4.874E-04        | 0.12           | 5.452E-18        | 0.07          | 7.680E-12        |
| RABL5                                                | Rab-like protein 5                                   | Q9H7X7  | 5.00             | 1.052E-05        | 0.05           | 8.277E-34        | 0.05          | 1.930E-15        |
| TRAF3IP1                                             | Intraflagellar transport protein 54 homolog          | A8MTK4  | 5.66             | 2.055E-06        | 0.07           | 8.327E-28        | 0.04          | 2.430E-16        |
| TTC26                                                | Tetratricopeptide repeat protein 26                  | A0AVF1  | 4.46             | 4.245E-05        | 0.10           | 4.634E-21        | 0.06          | 1.540E-13        |
| <b>Intraflagellar transport complex A</b>            |                                                      |         |                  |                  |                |                  |               |                  |
| IFT140                                               | Intraflagellar transport protein 140 homolog         | Q96RY7  | 3.61             | 4.387E-04        | 0.09           | 1.844E-22        | 0.06          | 3.050E-13        |
| <b>Cellular Signalling</b>                           |                                                      |         |                  |                  |                |                  |               |                  |
| CSNK2A1                                              | Casein kinase 2, alpha 1                             | B2R6D7  | 5.97             | 9.782E-07        | 0.69           | 5.754E-02        | 0.11          | 3.380E-09        |
| CSNK2A2                                              | Casein kinase 2, alpha 2                             | P19784  | 5.80             | 1.462E-06        | 0.73           | 8.186E-02        | 0.08          | 2.810E-11        |
| CSNK2B                                               | Casein kinase 2, beta                                | Q5SRQ6  | 6.13             | 6.684E-07        | 0.50           | 2.056E-03        | 0.12          | 3.570E-08        |
| WDR26                                                | WD repeat-containing protein 26                      | Q9H7D7  | 4.48             | 4.064E-05        | 0.15           | 5.276E-15        | 0.07          | 1.130E-12        |
| <b>Adapter proteins</b>                              |                                                      |         |                  |                  |                |                  |               |                  |
| YWHAE                                                | 14-3-3 protein epsilon                               | P62258  | 3.36             | 8.818E-04        | 1.08           | 4.438E-01        | 0.97          | 4.480E-01        |
| YWHAG                                                | 14-3-3 protein gamma                                 | P61981  | 4.89             | 1.377E-05        | 1.19           | 3.193E-01        | 0.90          | 3.568E-01        |
| YWHAH                                                | 14-3-3 protein eta                                   | Q04917  | 4.54             | 3.469E-05        | 1.21           | 3.022E-01        | 0.94          | 4.049E-01        |
| YWHAQ                                                | 14-3-3 protein theta                                 | P27348  | 4.17             | 9.234E-05        | 1.06           | 4.649E-01        | 1.03          | 4.563E-01        |
| <b>Miscellaneous</b>                                 |                                                      |         |                  |                  |                |                  |               |                  |
| KIAA0564                                             | KIAA0564                                             | A3KMH1  | 6.26             | 4.998E-07        | 0.09           | 1.238E-21        | 0.09          | 4.230E-10        |
| PGAM5                                                | Phosphoglycerate mutase family member 5              | Q96HS1  | 6.68             | 1.894E-07        | 0.15           | 7.942E-15        | 0.05          | 1.190E-15        |
| C20orf11                                             | Protein C20orf11                                     | Q9NWU2  | 5.65             | 2.098E-06        | 0.07           | 1.151E-25        | 0.05          | 1.010E-14        |
| RANBP9                                               | Ran-binding protein 9                                | Q96S59  | 6.92             | 1.115E-07        | 0.13           | 5.373E-17        | 0.04          | 4.570E-16        |
| YPEL5                                                | Protein yippee-like 5                                | P62699  | 6.37             | 3.878E-07        | 0.14           | 1.066E-15        | 0.09          | 1.640E-10        |
| USP9X                                                | Probable ubiquitin carboxyl-terminal hydrolase FAF-X | Q93008  | 4.57             | 3.218E-05        | 1.20           | 3.093E-01        | 0.30          | 7.257E-04        |
| <b>Ribosomal proteins</b>                            |                                                      |         |                  |                  |                |                  |               |                  |
| MRPS33                                               | 28S ribosomal protein S33                            | Q9Y291  | 3.42             | 7.456E-04        | 1.58           | 7.675E-02        | 0.63          | 9.037E-02        |
| RPLP0                                                | 60S acidic ribosomal protein P0                      | P05388  | 3.86             | 2.155E-04        | 1.86           | 2.346E-02        | 0.76          | 1.980E-01        |
| RPLP1                                                | 60S acidic ribosomal protein P1                      | P05386  | 3.36             | 9.007E-04        | 1.51           | 9.873E-02        | 1.00          | 4.369E-01        |
| RPL10A                                               | 60S ribosomal protein L10a                           | P62906  | 5.11             | 7.880E-06        | 1.57           | 7.722E-02        | 1.30          | 2.613E-01        |
| RPL12                                                | 60S ribosomal protein L12                            | P30050  | 4.75             | 1.992E-05        | 1.32           | 2.017E-01        | 1.22          | 3.331E-01        |
| RPL13                                                | 60S ribosomal protein L13                            | P26373  | 5.36             | 4.304E-06        | 2.49           | 1.463E-03        | 0.86          | 2.977E-01        |
| RPL13A                                               | 60S ribosomal protein L13a                           | P40429  | 5.06             | 9.098E-06        | 1.90           | 1.991E-02        | 1.21          | 3.422E-01        |
| RPL14                                                | 60S ribosomal protein L14                            | P50914  | 4.20             | 8.477E-05        | 1.95           | 1.561E-02        | 1.11          | 4.457E-01        |
| RPL18                                                | 60S ribosomal protein L18                            | Q07020  | 5.57             | 2.526E-06        | 1.82           | 2.817E-02        | 1.20          | 3.545E-01        |
| RPL21                                                | 60S ribosomal protein L21                            | P46778  | 5.97             | 9.799E-07        | 1.43           | 1.378E-01        | 1.31          | 2.534E-01        |
| RPL27                                                | 60S ribosomal protein L27                            | P61353  | 4.53             | 3.496E-05        | 1.97           | 1.426E-02        | 1.30          | 2.620E-01        |
| RPL3                                                 | 60S ribosomal protein L3                             | P39023  | 4.19             | 8.817E-05        | 2.59           | 9.255E-04        | 0.87          | 3.014E-01        |
| RPL30                                                | 60S ribosomal protein L30                            | A8MYX5  | 4.50             | 3.813E-05        | 1.81           | 2.930E-02        | 1.14          | 4.121E-01        |
| RPL32                                                | 60S ribosomal protein L32                            | P62910  | 5.82             | 1.394E-06        | 2.28           | 3.794E-03        | 0.50          | 2.921E-02        |
| RPL35A                                               | 60S ribosomal protein L35a                           | P18077  | 5.24             | 5.718E-06        | 1.73           | 4.118E-02        | 1.18          | 3.735E-01        |
| RPL36                                                | 60S ribosomal protein L36                            | Q9Y3U8  | 4.65             | 2.613E-05        | 2.77           | 4.287E-04        | 1.62          | 9.255E-02        |
| RPL4                                                 | 60S ribosomal protein L4                             | P36578  | 5.88             | 1.194E-06        | 2.11           | 7.807E-03        | 0.93          | 3.673E-01        |
| RPL6                                                 | 60S ribosomal protein L6                             | B2R4K7  | 5.08             | 8.553E-06        | 1.83           | 2.716E-02        | 0.73          | 1.750E-01        |
| RPL7A                                                | 60S ribosomal protein L7a                            | P62424  | 3.39             | 8.243E-04        | 1.85           | 2.410E-02        | 0.95          | 3.854E-01        |
| RPL8                                                 | 60S ribosomal protein L8                             | P62917  | 4.99             | 1.066E-05        | 2.07           | 9.341E-03        | 1.21          | 3.437E-01        |
| RPL28                                                | cDNA FLJ57954                                        | B4DEP9  | 4.76             | 1.955E-05        | 1.58           | 7.533E-02        | 1.16          | 3.977E-01        |
| RPL29                                                | cDNA FLJ78093                                        | A8K0H3  | 4.12             | 1.069E-04        | 1.78           | 3.241E-02        | 0.66          | 1.125E-01        |
| RPL15                                                | Ribosomal protein L15                                | B4DEN1  | 5.11             | 7.850E-06        | 2.20           | 5.243E-03        | 1.07          | 4.920E-01        |
| RPL7P23                                              | RPL7P23                                              | A8MY04  | 5.24             | 5.798E-06        | 1.76           | 3.556E-02        | 1.21          | 3.444E-01        |

**Quantitative Lebercilin protein complex analysis**

All proteins detected as specific interactors of wildtype Lebercilin (WT/SF-TAP) are listed, including the enrichment ratio and statistical value (Significance (A)). Additionally, the results are shown for two LCA-causative Lebercilin variants (p.P493TfsX1 and p.Q279X). The ratio of binding for both mutants, compared to wildtype Lebercilin and statistical value for altered binding (Significance (A)) are shown. Proteins, which show loss of binding to both Lebercilin mutants are highlighted in red. Proteins, showing altered binding to one mutant only are highlighted in yellow.



**Supplementary Table 2**

| Chlamydomonas Entrez Gene ID | Chlamydomonas locus tag | Chlamydomonas gene symbol | Chlamydomonas Alias | Note             | Human Entrez Gene ID | Human Gene Symbol | Human Entrez Gene aliases                                            | PBLAST Best reciprocal Human Protein | PBLAST Best reciprocal Chlamydomonas Protein |
|------------------------------|-------------------------|---------------------------|---------------------|------------------|----------------------|-------------------|----------------------------------------------------------------------|--------------------------------------|----------------------------------------------|
| 5725752                      | CHLREDRAFT_139789       | CHLREDRAFT_139789         | IFT122A             | IFT-A            | 55764                | IFT122            | SPG WDR10 WDR10p WDR140                                              | NP_060732.2                          | XP_001700201.1                               |
| 5727567                      | CHLREDRAFT_195385       | FAP118                    | IFT122B             | IFT-A            | 57539                | WDR35             | KIAA1336 MGC33196                                                    | NP_065830.2                          | XP_001702021.1                               |
| 5721885                      | CHLREDRAFT_126867       | FAP60                     | IFT139              | IFT-A            | 79809                | TTC21B            | FLJ11457 Nbla10696 THM1                                              | NP_079029.3                          | XP_001696517.1                               |
| 5721602                      | CHLREDRAFT_192205       | IFT140                    |                     | IFT-A            | 9742                 | IFT140            | DKFZp564L232 FLJ10306 FLJ30571 KIAA0590 WDC2 c305C8.4 c380F5.1 gs114 | NP_055529.2                          | XP_001696098.1                               |
| 5719170                      | CHLREDRAFT_143468       | FAP66                     | IFT144              | IFT-A            | 57728                | WDR19             | FLJ23127 KIAA1638 ORF26 PWDMP                                        | NP_079408.3                          | XP_001693746.1                               |
| 5722198                      | CHLREDRAFT_142470       | MOT41                     | IFT43               | IFT-A            | 112752               | C14orf179         | FLJ32173 MGC16028                                                    | NP_001096034.1                       | XP_001696653.1                               |
| 5717250                      | CHLREDRAFT_183240       | IFT172                    |                     | IFT-B            | 26160                | IFT172            | DKFZp434A163 KIAA1179 SLB osm-1 wim                                  | NP_056477.1                          | XP_001691740.1                               |
| 5727460                      | CHLREDRAFT_182072       | IFT20                     |                     | IFT-B            | 90410                | IFT20             |                                                                      | AAP50265.1                           | XP_001701966.1                               |
| 5715694                      | CHLREDRAFT_129193       | FAP156                    | IFT27               | IFT-B            | 11020                | IFT27             | RAYL RABL4                                                           | NP_001171172.1                       | XP_001689745.1                               |
| 5716734                      | CHLREDRAFT_108954       | FAP32                     | IFT46               | IFT-B            | 56912                | IFT46             | C11orf2 FLJ21827 C11ORF60                                            | NP_001162089.1                       | XP_001691140.1                               |
| 5717848                      | CHLREDRAFT_24116        | BLD1                      | IFT52               | IFT-B            | 51098                | IFT52             | C20orf9 CGI-53 NGD5 dj1028D15.1                                      | NP_057088.2                          | XP_001692161.1                               |
| 5724201                      | CHLREDRAFT_98642        | IFT57                     |                     | IFT-B            | 55081                | IFT57             | ESRRBL1 FLJ10147 HIPPI MHS4R2                                        | NP_060480.1                          | XP_001698648.1                               |
| 5715315                      | CHLREDRAFT_136521       | IFT74                     | IFT-71/IFT72        | IFT-B            | 80173                | IFT74             | CCDC2 CMG-1 CMG1 FLJ22621 MGC111562                                  | NP_001092693.1                       | XP_001689563.1                               |
| 5718874                      | CHLREDRAFT_24171        | IFT80                     |                     | IFT-B            | 57560                | IFT80             | ATD2 KIAA1374 MGC126543 WDR56                                        | NP_065851.1                          | XP_001693341.1                               |
| 5722735                      | CHLREDRAFT_138649       | IFT81                     |                     | IFT-B            | 28981                | IFT81             | CDV-1 CDV-1R CDV1 CDV1R MGC102777 MGC4027                            | NP_054774.2                          | XP_001697224.1                               |
| 5725696                      | CHLREDRAFT_24421        | IFT88                     |                     | IFT-B            | 8100                 | IFT88             | D13S1056E DAF19 MGC26259 RP11-172H24.2 TG737 TTC10 hTg737            | NP_783195.2                          | XP_001700100.1                               |
| 5715530                      | CHLREDRAFT_195877       | FAP9                      | IFT22               | IFT-B associated | 64792                | RABL5             | DKFZp761N0823 FLJ13225 FLJ14117                                      | NP_073614.1                          | XP_001689669.1                               |
| 5723882                      | CHLREDRAFT_98791        | FAP232                    | IFT25               | IFT-B associated | 51668                | HSPB11            | C1orf41 HSPCO34 PP25                                                 | NP_057210.2                          | XP_001698507.1                               |
| 5725022                      | CHLREDRAFT_185392       | FAP116                    | IFT54               | IFT-B associated | 26146                | TRAF3IP1          | DKFZp434F124 MIP-T3 MIPT3                                            | NP_056465.2                          | XP_001699472.1                               |
| 5722691                      | CHLREDRAFT_192420       | FAP22                     |                     | IFT-B associated | 23059                | CLUAP1            | FLJ13297 KIAA0643                                                    | NP_055856.1                          | XP_001697203.1                               |
| 5724373                      | CHLREDRAFT_81760        | DYF13                     |                     | IFT-B associated | 79989                | TTC26             | FLJ12571 MGC163211 dyf-13                                            | NP_079202.2                          | XP_001698769.1                               |
| 5717991                      | CHLREDRAFT_128801       | FAP259                    |                     | IFT-B associated | 92104                | TTC30A            | FLJ13946 FLJ77601                                                    | NP_689488.3                          | XP_001692406.1                               |

**Orthology mapping of *Chlamydomonas*, *Caenorhabditis*, *Trypanosoma* and *Danio* IFT (-associated) proteins to humans.**

Two IFT protein complexes were identified via biochemical purification in *Chlamydomonas*. IFT complex A (containing IFT43, IFT122A/122B, IFT139, IFT140 and IFT144) and IFT complex B (containing IFT20, IFT27, IFT46, IFT52, IFT57/55, IFT74/72, IFT80, IFT81, IFT88, IFT172) (9, 10, 17). Orthology mapping by the reciprocal best hit approach of PBLAST analyses of *Chlamydomonas*, *Caenorhabditis*, *Trypanosoma* and *Danio* IFT proteins, suggests that the C14orf179, WDR35, IFT122, TTC21B, WDR19 and IFT140 proteins are part of human IFT complex A, and IFT20 (26), IFT27, IFT46, IFT52 (20, 23-25), IFT57, IFT74, IFT80, IFT81, IFT88 and IFT172 are part of human IFT complex B. Future studies will reveal if the IFT complex B associated proteins: RABL5 (18, 22, 26), TTC30A/B (21, 26), TTC26 (19), CLUAP1 (21, 23, 26), HSPB11 (25) and TRAF3IP1 (28) are part of the IFT machinery.



**Supplementary Table 3**

| Gene name                                                     | Protein name                                 | Uniprot | IFT88-SF-TAP #1 | IFT88-SF-TAP #2 | IFT88-SF-TAP #3 |
|---------------------------------------------------------------|----------------------------------------------|---------|-----------------|-----------------|-----------------|
| <b>Intraflagellar transport complex B proteins</b>            |                                              |         |                 |                 |                 |
| IFT27                                                         | Intraflagellar transport protein 27 homolog  | Q9BW83  | 100% (2)        | 100% (3)        | 100% (2)        |
| IFT46                                                         | Intraflagellar transport protein 46 homolog  | Q9NQC8  | 100% (2)        | 100% (5)        | 100% (2)        |
| IFT52                                                         | Intraflagellar transport protein 52 homolog  | Q9Y366  | 100% (15)       | 100% (18)       | 100% (9)        |
| IFT57                                                         | Intraflagellar transport protein 57 homolog  | Q9NWB7  | 100% (10)       | 100% (19)       | 100% (9)        |
| IFT74                                                         | Intraflagellar transport protein 74 homolog  | Q96LB3  | 100% (5)        | 100% (9)        | 100% (5)        |
| IFT80                                                         | Intraflagellar transport protein 80 homolog  | Q9P2H3  | 100% (4)        | 100% (14)       | 100% (3)        |
| IFT81                                                         | Intraflagellar transport protein 81 homolog  | Q8WYA0  | 100% (3)        | 100% (4)        |                 |
| IFT88                                                         | Intraflagellar transport protein 88 homolog  | Q13099  | 100% (34)       | 100% (41)       | 100% (38)       |
| IFT172                                                        | Intraflagellar transport protein 172 homolog | Q9UG01  | 100% (34)       | 100% (41)       | 100% (38)       |
| <b>Intraflagellar transport complex B-associated proteins</b> |                                              |         |                 |                 |                 |
| CLUAP1                                                        | Clusterin-associated protein 1               | Q96AJ1  | 100% (3)        | 100% (2)        | 94% (1)         |
| HSPB11                                                        | Heat shock protein beta-11                   | Q9Y547  |                 | 100% (3)        | 100% (2)        |
| RABL5                                                         | Rab-like protein 5                           | Q9H7X7  | 100% (4)        | 100% (5)        | 100% (3)        |
| TTC26                                                         | Tetratricopeptide repeat protein 26          | A0AVF1  | 100% (8)        | 100% (12)       | 100% (10)       |
| TTC30A                                                        | Tetratricopeptide repeat protein 30A         | Q86WT1  | 100% (2)        | 100% (9)        | 100% (3)        |
| TTC30B                                                        | Tetratricopeptide repeat protein 30B         | Q84P2   | 89% (1)         | 100% (3)        |                 |
| TRAF3IP1                                                      | TRAF3-interacting protein 1                  | A8MTK4  |                 | 100% (2)        | 100% (2)        |
| <b>Varia</b>                                                  |                                              |         |                 |                 |                 |
| TMEM43                                                        | Transmembrane protein 43                     | Q9BTV4  | 100% (8)        | 100% (6)        | 100% (7)        |
| ATP1A1                                                        | Sodium/potassium-transporting ATPase         | P05023  | 100% (8)        | 100% (5)        | 100% (6)        |
| SLC25A4                                                       | ADP/ATP translocase 1                        | P12235  | 89% (1)         | 100% (2)        | 100% (2)        |
| SLC25A5                                                       | ADP/ATP translocase 2                        | P05141  | 100% (2)        | 100% (2)        |                 |
| TUBB6                                                         | Tubulin beta-6 chain                         | Q9BUF5  |                 | 100% (2)        | 100% (2)        |

**IFT88 SF-TAP analysis in HEK293T cells.**

Shown are the protein names, the Uniprot (<http://www.uniprot.org/>) accession numbers, identification probabilities and the number of unique peptides detected for each protein in three independent experiments, as determined by Scaffold analysis (Proteome Software). Proteins detected in the SF-TAP control were excluded, as well as known contaminants like keratins. All known IFT complex B proteins, except IFT20, and all proteins described to associate with IFT complex B were identified in the IFT88-SF-TAP analysis, demonstrating that these complexes are formed in HEK293T cells.

**Supplementary Table 4**

| Gene Symbol | RefSeq Accession Number | Gene ID | siRNA ID | Sense siRNA Sequence  | Antisense siRNA Sequence |
|-------------|-------------------------|---------|----------|-----------------------|--------------------------|
| SiSel_NC1   | NA                      | NA      | s813     | UAACGACGCGACGACGUAAtt | UUACGUCGUCGCGUGUUAtt     |
| LCA5        | NM_181714               | 167691  | s46679   | CAACUAGGAAUGUAUCCAAtt | UUGGAUACAUUCCUAGUUGgt    |
| LCA5        | NM_181714               | 167691  | s46677   | GCCCUAAGGUCUACCAAAtt  | UUUGGUAGACCCUUAGGGctt    |
| LCA5        | NM_181714               | 167691  | s46678   | GAAUUAAGGAGCUAUCGAAtt | UUCGAUAGCUCCUAAUUCtt     |
| TRAF3IP1    | NM_015650               | 26146   | s25157   | GAAGCUAAUUAUCAAtt     | UUGAGUAAUUAUAGCUUCtt     |
| TRAF3IP1    | NM_015650               | 26146   | s25159   | GGAUGAUAAUUCAGCUAGUtt | ACUAGCUGAAUUAUCAUCga     |
| TRAF3IP1    | NM_015650               | 26146   | s25158   | CAAGCUCUCUAGUGACGAUtt | AUCGUCACUAGAGAGCUUgtt    |

**Overview of the target sequences.**

Three siRNAs (Ambion, Silencer Select) targeting a single gene were combined and used in a final concentration of 15 nM. Non-targeting siRNA (SiSel\_NC1) served as negative control (15 nM).

## Supplementary Table 5

### qPCR primers used

| Gene       | Gene-ID | Forward (5'>3') primer | Reverse (3'>5') primer |
|------------|---------|------------------------|------------------------|
| hsGUSB     | 2990    | AGAGTGGTGCTGAGGATTGG   | CCCTCATGCTCTAGCGTGTC   |
| hsLCA5     | 167691  | CATCGCTGGTCAGTTCTTC    | GGTAGACCCCTTAGGGCTTGG  |
| hsLCA5     | 167691  | AATCGTCTGCCAAAGTCCTC   | AGGTCTGCAAAATCACTCTGG  |
| hsTRAF3IP1 | 26146   | GAAGGGCCTCTACACAGACG   | ACCACGTCTATGGCCTTTTG   |

### RT-PCR primers used

| Primername | Sequence              |
|------------|-----------------------|
| E3F1       | AGAAACTGGTTTCGGCGAG   |
| en2R1      | ATGCATCTGCGTTCTTCTT   |
| E2F1       | ATTGCCAGACACCAAGACT   |
| E4R1       | CTGGAACTGTTCTGTCTCA   |
| E3F2       | GGGCGACAGAGAAAAGAGTG  |
| LacZ6R     | TGGCGAAAGGGGGATGTG    |
| rig/S15F   | TTCCGCAAGTTCACCTACC   |
| rig/S15R   | CGGGGCCGCCATGCT TTACG |

### Genotyping primers used

| Primername | Sequence              |
|------------|-----------------------|
| I3F5       | AGAGAGCCATTTGCTTTGAGA |
| I3R1       | CTACCATGCAGACCCAAGGT  |
| En2.6R     | CGGTACCAGACTCTCCCATC  |

### Overview of primers used in this study.

Primers used for quantitative PCR (qPCR), RT-PCR and genotyping.
